# Supplementary material for: Acute pancreatitis in pregnancy: a 10-year, multi-center, retrospective study in Beijing
Source: BMC Pregnancy Childbirth. 2022 May 17;22:414. doi: 10.1186/s12884-022-04742-8 (PMC9115992; doi:10.1186/s12884-022-04742-8)
Supplement: Supplementary file 1 — Additional file 1: Data 1. The basic information of fetus of APIP patients. [file 12884_2022_4742_MOESM1_ESM.xlsx]

## Sheet: Sheet1
	Gestational age	Length (cm)	Weight (g)	1MIN Apgar score	2MIN Apgar score	3MIN Apgar score
MAP	36+4	48	2815	9	10	10
	34+	44	2540	10	10	10
	34+	43	1840	10	10	10
	36+	48	2660	9	10	10
	37+	50	3450	10	10	10
	39+	47	2900	10	10	10
	34+	44	2650	10	10	10
	37+	50	3170	9	10	10
	37+	48	2705	10	10	10
	38+	51	3385	10	10	10
	39+	50	3010	10	10	10
	32+	44	1780	10	10	10
	32+	43	1595	10	10	10
	30+	39	1480	10	10	10
	30+	38	1200	8	10	10
MSAP	35+	48	2850	10	10	10
	36+1	48	2640	9	10	10
	38+1	50	3160	9	10	10
SAP	31+5	40	2010	7	9	9
	39+	46	2900	10	10	10
	32+	43	2080	7	9	9
	37+	43	3000	10	10	10
	39+	51	3800	10	10	10
	38+	47	2645	10	10	10
	31+	45	1700	5	5	5
	37+	45	2400	10	10	10
	40	52	3860	8	10	10
Data 1：The basic information of fetus of APIP patients
